# Supplementary material
Source: MDPI journal article supplement (https://www.mdpi.com/2412-3811/9/2/35)
Supplement: s1 [file s1]

Archive with 2 entries (2 files):
- HFET_Guidelines_v03.pdf
- HFET_Rural Highways.xlsm
