# Supplementary material
Source: MDPI journal article supplement (https://www.mdpi.com/2412-3811/9/2/35)
Supplement: s1 [file s1 › HFET_Rural Highways.xlsm]

## Sheet: Segment Data
	Evaluation Segment ID					Number of Challenging Locations		1
	Road Name
	Direction						Challenging Locations	Km posts [km]	Number
	Reference for distances					1
	Starting km					2
	Ending km					3
	Inspection Date					4
	Compiling Date					5
	Road Category					6
	HFES [km]	0				7
						8
						9
						10
	Colors meaning (to de considered also in other sheets):		must be filled
			Filled by the software
			to be modified only if the users want to set conditions different than standard conditions
		all other colors	to not be modified

## Sheet: DSD - A
AUTOMATIC EVALUATION																			FAST REDUCTION
																			SPEED CHANGE
	Decelaration Data			Decelaration
	0	Grade (decimal)		3.6297	m/s2
	0.37	Avg. Friction factor
FALSE	1		2	3	4	5	6	7	8	9	10
1	CRITICAL LOCATION #1	0	Hard to identify	Time considered [s]	Available line of sight [m]	Speed [km/h]		Required Length [m]	Cumulative Length [m]	Evaluation	Manouvre type	1
						Approaching	Final
	1. Is the Manouvre section present?			-		0		0	0	#N/A	#N/A
	2. Is the Response section present (2-3 sec)?			#N/A				#N/A	#N/A	#N/A
	3. Is the Anticipation section present (2-3 sec)?							#N/A	#N/A	#N/A
	4. Is the Advance Warning section present (3 sec)?			3				0	#N/A	#N/A
TRUE	1		2	3	4	5	6	7	8	9	10
2	CRITICAL LOCATION #2	0	Hard to identify	Time considered [s]	Available line of sight [m]	Speed (km/h)		Required Length [m]	Cumulative Length [m]	Check	Manouvre type	2
						Approaching	Final								Velocità con cui è possibile affrontare i punti singolari	Set Speed
	1. Is the Manouvre section present?			-		0		0	0	#N/A	#N/A				Curve	1	SPEED CHANGE
	2. Is the Response section present (2-3 sec)?			#N/A				#N/A	#N/A	#N/A					Crossing	0	FAST REDUCTION
	3. Is the Anticipation section present (2-3 sec)?							#N/A	#N/A	#N/A					Driveway	0	FAST REDUCTION
	2. Is the Advance Warning section present (3 sec)?			3				0	#N/A	#N/A					Stopping area	0	FAST REDUCTION
															At-grade intersection	0	FAST REDUCTION
TRUE	1		2	3	4	5	6	7	8	9	10				Level crossing	0	FAST REDUCTION
3	CRITICAL LOCATION #3	0	Hard to identify	Time considered [s]	Available line of sight [m]	Speed (km/h)		Required Length [m]	Cumulative Length [m]	Check	Manouvre type	3			Lane Change	1	SPEED CHANGE
						Approaching	Final								Other (any point that potentially requires a change in driver behaviour)	1	SPEED CHANGE
	1. Is the Manouvre section present?			-		0		0	0	#N/A	#N/A					1	SPEED CHANGE
	2. Is the Response section present (2-3 sec)?			#N/A				#N/A	#N/A	#N/A					Input critical location	1	NULL
	3. Is the Anticipation section present (2-3 sec)?							#N/A	#N/A	#N/A
	2. Is the Advance Warning section present (3 sec)?			3				0	#N/A	#N/A
TRUE	1		2	3	4	5	6	7	8	9	10
4	CRITICAL LOCATION #4	0	Hard to identify	Time considered [s]	Available line of sight [m]	Speed (km/h)		Required Length [m]	Cumulative Length [m]	Check	Manouvre type	4
						Approaching	Final
	1. Is the Manouvre section present?			-		0		0	0	#N/A	#N/A
	2. Is the Response section present (2-3 sec)?			#N/A				#N/A	#N/A	#N/A
	3. Is the Anticipation section present (2-3 sec)?							#N/A	#N/A	#N/A
	2. Is the Advance Warning section present (3 sec)?			3				0	#N/A	#N/A
TRUE	1		2	3	4	5	6	7	8	9	10
5	CRITICAL LOCATION #5	0	Hard to identify	Required Length	Available line of sight [m]	Speed (km/h)		Required Length [m]	Cumulative Length [m]	Check	Manouvre type	5
				(m)		Approaching	Final
	1. Is the Manouvre section present?			-		0		0	0	#N/A	#N/A
	2. Is the Response section present (2-3 sec)?			#N/A				#N/A	#N/A	#N/A
	3. Is the Anticipation section present (2-3 sec)?							#N/A	#N/A	#N/A
	2. Is the Advance Warning section present (3 sec)?			0				0	#N/A	#N/A
TRUE	1		2	3	4	5	6	7	8	9	10
6	CRITICAL LOCATION #6	0	Hard to identify	Time considered [s]	Available line of sight [m]	Speed (km/h)		Required Length [m]	Cumulative Length [m]	Check	Manouvre type	6
						Approaching	Final
	1. Is the Manouvre section present?			-		0		0	0	#N/A	#N/A
	2. Is the Response section present (2-3 sec)?			#N/A				#N/A	#N/A	#N/A
	3. Is the Anticipation section present (2-3 sec)?							#N/A	#N/A	#N/A
	2. Is the Advance Warning section present (3 sec)?			3				0	#N/A	#N/A
TRUE	1		2	3	4	5	6	7	8	9	10
7	CRITICAL LOCATION #7	0	Hard to identify	Time considered [s]	Available line of sight [m]	Speed (km/h)		Required Length [m]	Cumulative Length [m]	Check	Manouvre type	7
						Approaching	Final
	1. Is the Manouvre section present?			-		0		0	0	#N/A	#N/A
	2. Is the Response section present (2-3 sec)?			#N/A				#N/A	#N/A	#N/A
	3. Is the Anticipation section present (2-3 sec)?							#N/A	#N/A	#N/A
	2. Is the Advance Warning section present (3 sec)?			3				0	#N/A	#N/A
TRUE	1		2	3	4	5	6	7	8	9	10
8	CRITICAL LOCATION #8	0	Hard to identify	Time considered [s]	Available line of sight [m]	Speed (km/h)		Required Length [m]	Cumulative Length [m]	Check	Manouvre type	8
						Approaching	Final
	1. Is the Manouvre section present?			-		0		0	0	#N/A	#N/A
	2. Is the Response section present (2-3 sec)?			#N/A				#N/A	#N/A	#N/A
	3. Is the Anticipation section present (2-3 sec)?							#N/A	#N/A	#N/A
	2. Is the Advance Warning section present (3 sec)?			3				0	#N/A	#N/A
TRUE	1		2	3	4	5	6	7	8	9	10
9	PUNTO SINGOLARE #9	0	Hard to identify	Time considered [s]	Available line of sight [m]	Speed (km/h)		Required Length [m]	Cumulative Length [m]	Check	Manouvre type	9
						Approaching	Final
	1. Is the Manouvre section present?			-		0		0	0	#N/A	#N/A
	2. Is the Response section present (2-3 sec)?			#N/A				#N/A	#N/A	#N/A
	3. Is the Anticipation section present (2-3 sec)?							#N/A	#N/A	#N/A
	2. Is the Advance Warning section present (3 sec)?			3				0	#N/A	#N/A
TRUE	1		2	3	4	5	6	7	8	9	10
10	CRITICAL LOCATION #10	0	Hard to identify	Time considered [s]	Available line of sight [m]	Speed (km/h)		Required Length [m]	Cumulative Length [m]	Check	Manouvre type	10
						Approaching	Final
	1. Is the Manouvre section present?			-		0		0	0	#N/A	#N/A
	2. Is the Response section present (2-3 sec)?			#N/A				#N/A	#N/A	#N/A
	3. Is the Anticipation section present (2-3 sec)?							#N/A	#N/A	#N/A
	2. Is the Advance Warning section present (3 sec)?			3				0	#N/A	#N/A

## Sheet: DSD - B
MANUAL EVALUATION
			FALSE
			1	1. Moderation of transitional area		v (km/h)	Lenght (m)	Cum. Length [m]	Evaluation (1 or 0)	Comments	0	1
				- manoeuvre section exists				0
				- response section section exists? (2-3sec)				0
				- anticipation section exists? (2-3sec)				0
				- advance warning section exists?				0
				Transition zone total					0	#DIV/0!
			TRUE
			2	1. Moderation of transitional area		v (km/h)	Lenght (m)	Lenght cum. (m)	Evaluation (1 or 0)	Comments	0	2
				- manoeuvre section exists				0
				- response section section exists? (2-3sec)				0
				- anticipation section exists? (2-3sec)				0
				- advance warning section exists?				0
				Transition zone total					0	#DIV/0!
			TRUE
			3	1. Moderation of transitional area		v (km/h)	Lenght (m)	Lenght cum. (m)	Evaluation (1 or 0)	Comments	0	3
				- manoeuvre section exists				0
				- response section section exists? (2-3sec)				0
				- anticipation section exists? (2-3sec)				0
				- advance warning section exists?				0
				Transition zone total					0	#DIV/0!
			TRUE
			4	1. Moderation of transitional area		v (km/h)	Lenght (m)	Lenght cum. (m)	Evaluation (1 or 0)	Comments	0	4
				- manoeuvre section exists				0
PIARC 2016, Human Factors Guidelines for a Safer Man-Road Interface				- response section section exists? (2-3sec)				0
				- anticipation section exists? (2-3sec)				0
				- advance warning section exists?				0
				Transition zone total					0	#DIV/0!
			TRUE
			5	1. Moderation of transitional area		v (km/h)	Lenght (m)	Lenght cum. (m)	Evaluation (1 or 0)	Comments	0	5
				- manoeuvre section exists				0
				- response section section exists? (2-3sec)				0
				- anticipation section exists? (2-3sec)				0
				- advance warning section exists?				0
				Transition zone total					0	#DIV/0!
			TRUE
			6	1. Moderation of transitional area		v (km/h)	Lenght (m)	Lenght cum. (m)	Evaluation (1 or 0)	Comments	0	6
				- manoeuvre section exists				0
				- response section section exists? (2-3sec)				0
				- anticipation section exists? (2-3sec)				0
				- advance warning section exists?				0
				Transition zone total					0	#DIV/0!
			TRUE
			7	1. Moderation of transitional area		v (km/h)	Lenght (m)	Lenght cum. (m)	Evaluation (1 or 0)	Comments	0	7
				- manoeuvre section exists				0
				- response section section exists? (2-3sec)				0
				- anticipation section exists? (2-3sec)				0
				- advance warning section exists?				0
				Transition zone total					0	#DIV/0!
			TRUE
			8	1. Moderation of transitional area		v (km/h)	Lenght (m)	Lenght cum. (m)	Evaluation (1 or 0)	Comments	0	8
				- manoeuvre section exists				0
				- response section section exists? (2-3sec)				0
				- anticipation section exists? (2-3sec)				0
				- advance warning section exists?				0
				Transition zone total					0	#DIV/0!
			TRUE
			9	1. Moderation of transitional area		v (km/h)	Lenght (m)	Lenght cum. (m)	Evaluation (1 or 0)	Comments	0	9
				- manoeuvre section exists				0
				- response section section exists? (2-3sec)				0
				- anticipation section exists? (2-3sec)				0
				- advance warning section exists?				0
				Transition zone total					0	#DIV/0!
			TRUE
			10	1. Moderation of transitional area		v (km/h)	Lenght (m)	Lenght cum. (m)	Evaluation (1 or 0)	Comments	0	10
				- manoeuvre section exists				0
				- response section section exists? (2-3sec)				0
				- anticipation section exists? (2-3sec)				0
				- advance warning section exists?				0
				Transition zone total					0	#DIV/0!

## Sheet: I Rule
	Chosen DSD (A or B)	A
	4-6 SECONDS RULE
	Feature to evaluate	Challenging Locations evaluation										Notes
		0	-	-	-	-	-	-	-	-	-
1.1	MODERATION OF TRANSITIONAL AREA	1	2	3	4	5	6	7	8	9	10	Compile only if any Challenging Location (CL) is present					29
1.1.1	Visibility of the Challenging Locations	0	-	-	-	-	-	-	-	-	-						1	Column number of the more critical CHL
a.	Is the Manouvre section present?	#N/A	na	na	na	na	na	na	na	na	na						#N/A
b.	Is the Response section present (2-3 sec)?	#N/A	na	na	na	na	na	na	na	na	na						#N/A
c.	Is the Anticipation section present (2-3 sec)?	#N/A	na	na	na	na	na	na	na	na	na						#N/A
d.	Is the Advance Warning section present (3 sec)?	#N/A	na	na	na	na	na	na	na	na	na						#N/A
	TOTAL 1.1	na	na	na	na	na	na	na	na	na	na
1.2	PERCEPTION AND VISIBILITY	1	2	3	4	5	6	7	8	9	10	Compile only if any Challenging Location (CL) is present					21
1.2.1	Visibility, perception, and identification of Challenging Locations	0	-	-	-	-	-	-	-	-	-						1	Column number of the more critical CHL
a.	The Challenging Location is obvious and clear (at least in the anticipation section)																0
b.	Visibility is not restricted by plants, terrain, buildings, traffic signs, control devices, roadside furniture, …)																0
c.	Roadside furniture/equipment and traffic control devices are clearly visible and helps to idetifyi the CHL (traffic signs and signals, markings, safety barriers)																0
d.	Day: the luminance of road surface and traffic signs/markings is sufficient																0
e.	Night: CHL is illuminated (no curve), and the luminance of road surface and traffic signs/markings is sufficient, retroreflection of traffic signs/markings is sufficient																0
	TOTAL 1.2.1	na	na	na	na	na	na	na	na	na	na						15
1.2.2	Curves	0	-	-	-	-	-	-	-	-	-						1	Column number of the more critical CHL
a.	Curve is visible (at least 6 sec. ahead to the braking section)																0
b.	Curve is not on/behind a crest																0
c.	Shoulder and marking of the outer curve are visible (at least in the response section)																0
d.	Visibility on the inner curve is not restricted																0
	TOTAL 1.2.2	na	na	na	na	na	na	na	na	na	na						9
1.2.3	At-grade intersections, driveways and crossings visibility	0	-	-	-	-	-	-	-	-	-						1	Column number of the more critical CHL
a.	Priority traffic is visible (for at least 6 sec. ahead)*																0
b.	The CHL is not on or behind a crest																0
c.	CHL configuration is clear (at least in the anticipation section)																0
d.	The CHL is not in or after a curve																0
	TOTAL 1.2.3	na	na	na	na	na	na	na	na	na	na						4
1.2.4	Unmistakable right of way*	0	-	-	-	-	-	-	-	-	-						1	Column number of the more critical CHL
a.	Road hierarchy is clear																0
b.	Lay-out and/or surface of main and minor road are not similar (e.g. colour variations or different paving material, surface quality)																0
c.	The minor road is not aligned with the main road																0
	TOTAL 1.2.4	na	na	na	na	na	na	na	na	na	na
	TOTAL 1.2	na	na	na	na	na	na	na	na	na	na
	First Rule - Results for each Challenging Location	na	na	na	na	na	na	na	na	na	na	TOTAL					#N/A
	*These conditions should be evaluated also coming from the minor road and the worst result should be considered. Don't make the evaluation for signalized intersections. If the evaluation is not possible, put "na".	1	2	3	4	5	6	7	8	9	10

## Sheet: II Rule
	FIELD OF VIEW RULE
	Feature to evaluate	Challenging Locations evaluation										Notes
		0	-	-	-	-	-	-	-	-	-
2.1	DENSITY AND SHAPE OF THE FIELD OF VIEW	1	2	3	4	5	6	7	8	9	10						58
2.1.1	Monotony of road section and surroundings	0	-	-	-	-	-	-	-	-	-	Consider the area in the periphereal field of view, beyond road margins.					1	Column number of the more critical CHL
a.	Diversified planting or buildings (variation in height, distance, ...)																0
b.	Good light contrast and good colour contrast in the environment																0
c.	Road environment well structured (e.g., by fixation objects that attract driver's attention, but do not distract)																0
	TOTAL 2.1.1	na	na	na	na	na	na	na	na	na	na						53
2.1.2	Long/far visible approaching sections before CHL	0	-	-	-	-	-	-	-	-	-						1	Column number of the more critical CHL
a.	Road environment well structured (e.g. by fixation objects that guide drivers attention to a closer point than the horizon, but not distract)																0
b.	Road environment composed by a sinuous “rhythmic” alignment																0
c.	Stretches are avoided where a "wider or longer" space is perceived																0
	TOTAL 2.1.2	na	na	na	na	na	na	na	na	na	na
	TOTAL 2.1	na	na	na	na	na	na	na	na	na	na
2.2	ELEMENTS IN THE LATERAL ROADSIDE ENVIRONMENT SUPPORT OPTIMAL LANE KEEPING	1	2	3	4	5	6	7	8	9	10						46
2.2.1	Structures above the road	0	-	-	-	-	-	-	-	-	-						1	Column number of the more critical CHL
a.	They are of equal height																0
b.	In the field of view, they are symmetrical to the road centre																0
c.	In the horizontal plane, they are perpendicular to the road axis: skew angle less than 15°																0
	TOTAL 2.2.1	na	na	na	na	na	na	na	na	na	na						41
2.2.2	Presence of eye-catching objects	0	-	-	-	-	-	-	-	-	-						1	Column number of the more critical CHL
a.	Eye-catching objects do not 'disrupt' the continuity of lateral guidance clues																0
b.	Eye-catching objects are symmetrical with road’s centreline																0
c.	Eye-catching axis to eye-catching objects aligns with the road axis																0
	TOTAL 2.2.2	na	na	na	na	na	na	na	na	na	na						36
2.2.3	Illusion-free optical guidance	0	-	-	-	-	-	-	-	-	-						1	Column number of the more critical CHL
a.	Lateral guidance clues/orientation lines are present and parallel																0
b.	Lateral guidance clues/orientation lines are consistently spaced and equally sized																0
c.	Lateral guidance clues/orientation lines are unambiguous																0
	TOTAL 2.2.3	na	na	na	na	na	na	na	na	na	na						33
2.2.4	Carriageway width changes are well delineated	0	-	-	-	-	-	-	-	-	-						1	Column number of the more critical CHL
a.	Carriageway width reductions/increases are well delineated and clearly visible (e.g. with the use of control devices, markings, posts, …)																0
	TOTAL 2.2.4	na	na	na	na	na	na	na	na	na	na						30
2.2.5	Roadside objects appear to be vertical	0	-	-	-	-	-	-	-	-	-						1	Column number of the more critical CHL
a.	Roadside objects appear to be vertical																0
	TOTAL 2.2.5	na	na	na	na	na	na	na	na	na	na						24
2.2.6	Curve's framing	0	-	-	-	-	-	-	-	-	-						1	Column number of the more critical CHL
a.	Lateral optical guidance-frame of the outer curve is present and parallel																0
b.	There are no gaps in the lateral guidance-frame in the outer curve																0
c.	No obstructions to overview the inner curve																0
d.	Edge line markings in outer and inner curve are present and visible																0
	TOTAL 2.2.6	na	na	na	na	na	na	na	na	na	na
	TOTAL 2.2	na	na	na	na	na	na	na	na	na	na
2.3	DEPTH OF THE FIELD VIEW	1	2	3	4	5	6	7	8	9	10						18
2.3.1	Dominant eye-catching objects support the detection of the Challenging Location	0	-	-	-	-	-	-	-	-	-						1	Column number of the more critical CHL
a.	View axis to eye-catching objects aligns with the road axis																0
b.	Eye-catching objects guide the view to the Challenging Location																0
	TOTAL 2.3.1	na	na	na	na	na	na	na	na	na	na						10
2.3.2	Presence of optical illusion	0	-	-	-	-	-	-	-	-	-						1	Column number of the more critical CHL
a.	Distance illusion avoided (e.g. illusions by non-parallel safety barriers, plantings, or other non-parallel orientation lines)																0
b.	Perspective illusion avoided (e.g. illusions by safety barriers that cover parts of the lane, or that create the illusion that a car is located were it shouldn't be)																0
c.	Curve illusion avoided (e.g. sharp curves not co-located with vertical curves, lateral guidance in the outer curve is not parallel, distance not well perceived)																0
d.	At night signs don’t give wrong expectation of road direction																0
e.	Estimation of speed and distances supported by reference cues at CHL																0
f	Negative slope is visually well perceived																0
	TOTAL 2.3.2	na	na	na	na	na	na	na	na	na	na						4
2.3.3	Course of the road clearly visible	0	-	-	-	-	-	-	-	-	-						1	Column number of the more critical CHL
a.	Driver provided with a good optical guidance of the road that is consistent with his expectations																0
b.	Overtaking manoeuvre is possible under safe condition																0
c.	If not, there were sufficient overtaking opportunities under safe conditions in the last 5 minutes																0
d.	Bridges, tunnels, and crests visible at least 6 seconds ahead																0
	TOTAL 2.3.3	na	na	na	na	na	na	na	na	na	na
	TOTAL 2.3	na	na	na	na	na	na	na	na	na	na
	Second Rule - Results for each Challenging Location	na	na	na	na	na	na	na	na	na	na	TOTAL					0
		1	2	3	4	5	6	7	8	9	10

## Sheet: III Rule
	LOGIC RULE
	Feature to evaluate	Challenging Locations evaluation										Notes
		0	-	-	-	-	-	-	-	-	-
3.1	CHANGE OF ROAD'S FUNCTION	1	2	3	4	5	6	7	8	9	10	To be evaluated when the Challenging Locations identifies a change between two adjacent EXSE					54
3.1.1	Visual clues reinforce changed road function (change in the EXSE or change in the road category).	0	-	-	-	-	-	-	-	-	-	Consider the area in the periphereal field of view, beyond road margins.					1	Column number of the more critical CHL
a.	There is a change in the road surface characteristics (kerbstones, surface colour, ...)																0
b.	There is a change in the roadside characteristics (planting, pavement, sidewalk, footpath, …)																0
c.	Eye-catching and/or fixation objects are used to reinforce the change (signs, objects, ...)?																0
d.	For town entrance: the urban environment over the road margins is well-perceived																0
e.	Transition zone before the change of road function is adequate (4-6 seconds).	na	na	na	na	na	na	na	na	na	na						na
	TOTAL 3.1.1	na	na	na	na	na	na	na	na	na	na
	TOTAL 3.1	na	na	na	na	na	na	na	na	na	na
3.2	CURSE OF THE ROAD'S SUPPORTED BY A DOMINANT EYE-CATCHING GUIDANCE	1	2	3	4	5	6	7	8	9	10						46
3.2.2	Road’s main direction clearly identifiable	0	-	-	-	-	-	-	-	-	-						1	Column number of the more critical CHL
a.	The right road direction is visible and clearly perceived (there are no umbiguity about the road development).																0
b.	Eye-catching/fixation objects are used to focus attention to the right alignment (traffic signs, objects, plants, ...).*																0
c.	Transition zone before the alignment misleading is adequate (4-6 seconds).*	na	na	na	na	na	na	na	na	na	na						na
d.	There are no misleading eye-catchers along the wrong road alignment (or if so, their influence is eliminated by planted embankments, placement of fixation objects, ...).*																0
	TOTAL 3.2.2	na	na	na	na	na	na	na	na	na	na
	TOTAL 3.2	na	na	na	na	na	na	na	na	na	na
3.3	EFFECT OF PRE-PROGRAMMED HABITS AND EXPECTATIONS	1	2	3	4	5	6	7	8	9	10						41
3.3.1	The CHL is expected	0	-	-	-	-	-	-	-	-	-						1	Column number of the more critical CHL
a.	Based on the road characteristics, the CHL is expected																0
	TOTAL 3.3.1	na	na	na	na	na	na	na	na	na	na						34
3.3.2	The road has been changed during the last 3 years	0	-	-	-	-	-	-	-	-	-						1	Column number of the more critical CHL
a.	Requirement for a new driving programme is easily recognised.																0
b.	New driving programme because of road modification underlined by change of alignment (e.g. roundabouts, curved approaches, median entry treatments...)*																0
c.	New driving programme because of road modification underlined by adequate transition zone with anticipation and response section at minimum*	na	na	na	na	na	na	na	na	na	na						na
d.	New driving programme because of road modification underlined by ensuring that the modified road arrangement and alignment beyond are clearly visible*	na	na	na	na	na	na	na	na	na	na						na
e.	New driving programme because of road modification underlined by ensuring visibility of the modified traffic control devices*	na	na	na	na	na	na	na	na	na	na						na
	TOTAL 3.3.2	na	na	na	na	na	na	na	na	na	na						29
3.3.3	Road geometrical alignment conforms with drivers expectation	0	-	-	-	-	-	-	-	-	-						1	Column number of the more critical CHL
a.	The curve where the CHL is located, is consistent with the previous element (curve/curve, or curve/straight)																0
b.	The element where the CHL is located, is consistent with the whole stretch alignment (curve/curves, or straight/straights)																0
c.	Compound curves with multiple radii are avoided																0
	TOTAL 3.3.3	na	na	na	na	na	na	na	na	na	na						23
3.3.4	Challenging Transitions and Challenging Locations are visible, understandable and progressively introduced.	0	-	-	-	-	-	-	-	-	-						1	Column number of the more critical CHL
a.	Visible (at least 4-6 seconds ahead)	#N/A	na	na	na	na	na	na	na	na	na						#N/A
b.	If visible, the driver has a good overview																0
c.	Clues and instructions are provided and are understandable (if curve: consider only Curve20)																0
d.	Clues and instructions are easily associable to the CHL																0
	TOTAL 3.3.4	na	na	na	na	na	na	na	na	na	na
	TOTAL 3.3	na	na	na	na	na	na	na	na	na	na
3.4	SUDDEN INCREASE OF DECISION NEEDS AND OVERLOAD OF INFORMATION PROCESSING CAPABILITIES	1	2	3	4	5	6	7	8	9	10						13
3.4.1	Many sources of information are present at the same time	0	-	-	-	-	-	-	-	-	-	This evaluation must include also the locations close to the analysed Challenging Location (2-3 seconds), which are not Challenging Locations.					1	Column number of the more critical CHL
a.	Multiple PCLs are avoided (considering not only Challenging Locations)																0
b.	All PCLs are clearly visible and easily distinguishable.																0
c.	Overload of information processing avoided.																0
d.	Not more than 3 decisions are necessary.																0
e.	Driver is progressively informed of each PCL.																0
f	If the CHL is after a tunnel entrance or exit, the transition zone is adequate (response and anticipation section).																0
	TOTAL 3.4.1	na	na	na	na	na	na	na	na	na	na
	TOTAL 3.4	na	na	na	na	na	na	na	na	na	na
3.5	DEFICIENCIES IN TRAFFIC CONTROL DEVICES**	1	2	3	4	5	6	7	8	9	10						4
3.5.1	Evaluation of traffic control devices	0	-	-	-	-	-	-	-	-	-						1	Column number of the more critical CHL
a.	Traffic control devices present, visible against background, and in good position (size, contrast, brightness).		na	na	na	na	na	na	na	na	na						0
b.	Traffic control devices are consitent with the road category (e.g. size of the signs too little for the road type, or inappropriate shape).		na	na	na	na	na	na	na	na	na						0
c.	Traffic control devices are in accordance with road characteristics/development (e.g. overturned, speed limits).		na	na	na	na	na	na	na	na	na						0
d.	Pictograms and letters are readable, unambiguous and understandable.		na	na	na	na	na	na	na	na	na						0
e.	The configuration of the traffic control devices is consistent with the road alignment and provides the right expectations, especially at night.		na	na	na	na	na	na	na	na	na						0
	TOTAL 3.5.1	na	na	na	na	na	na	na	na	na	na
	TOTAL 3.5	na	na	na	na	na	na	na	na	na	na
	Third Rule - Results for each Challenging Location	na	na	na	na	na	na	na	na	na	na	TOTAL					#N/A
	*To be evaluated only if letter a. of the same subsection (grey) is 0. **Judge the overall HFES, if at least one requirement is not satisfied, put 0.	1	2	3	4	5	6	7	8	9	10
	PCLs = Potentially Critical Locations. CHLs are PCLs.

## Sheet: Results
	Human Factor Score Results										First Rule	Second Rule	Third Rule	Total	0	1	na
											#N/A	0	#N/A	#N/A	76	0	5
	Human Factors Requirement				Human Factors Score					Human Factors Requirement				Human Factors Score					Human Factors Requirement				Human Factors Score
	Rule	Inv. Topic	Subsection	Demand	Evaluation	Subsection	Inv. Topic	Rule		Rule	Inv. Topic	Subsection	Demand	Evaluation	Subsection	Inv. Topic	Rule		Rule	Inv. Topic	Subsection	Demand	Evaluation	Subsection	Inv. Topic	Rule
	I RULE	1.1	1.1.1	a	#N/A	#N/A	#N/A	#N/A		II RULE	2.1	2.1.1	a	0	0	0	0		III RULE	3.1	3.1.1	a	0	0	0	#N/A
				b	#N/A								b	0	0							b	0
				c	#N/A								c	0								c	0
				d	#N/A							2.1.2	a	0	0							d	0
		1.2	1.2.1	a	0	0	0						b	0								e	na
				b	0								c	0						3.2	3.2.1	a	0	0
				c	0						2.2	2.2.1	a	0	0	0						b	0
				d	0								b	0	0							c	na
				e	0								c	0								d	0
			1.2.2	a	0	0						2.2.2	a	0	0					3.3	3.3.1	a	0
				b	0								b	0							3.3.2	a	0	0	0
				c	0								c	0								b	0
				d	0							2.2.3	a	0	0							c	na
			1.2.3	a	0	0							b	0								d	na
				b	0								c	0								e	na
				c	0							2.2.4	a	0	0						3.3.3	a	0	0	0
				d	0							2.2.5	a	0	0	0						b	0
			1.2.4	a	0	0						2.2.6	a	0	0							c	0
				b	0								b	0							3.3.4	a	#N/A	#N/A	#N/A
				c	0	0							c	0								b	0
													d	0								c	0
											2.3	2.3.1	a	0	0							d	0
													b	0						3.4	3.4.1	a	0	0	0
		Total HFS		#N/A								2.3.2	a	0	0							b	0
													b	0								c	0
													c	0								d	0
													d	0								e	0
													e	0								f	0
													f	0						3.5	3.5.1	a	0	0
												2.3.3	a	0	0							b	0
													b	0								c	0
													c	0								d	0
													d	0								e	0

## Sheet: Foglio1
Human Factors Man-Road-Interface-Exploration© 2017
Road-Nr.: Kilometer: Evaluator:							mettere insieme punti singolari coincidenti:
					1 = required and present
I. 6-Seconds-Rule: Give drivers enough time (4-6sec)					0 = required and not present
					na = not requirede or not applicable
1. Moderation of transitional area		v (km/h)	Lenght (m)	Lenght cum. (m)	Evaluation		% and comments
- manoeuvre section exists		75	50	50	1	1
- response section section exists? (2-3sec)		75	60	110	0	1
- anticipation section exists? (2-3sec)		75	60	170	0	1
- advance warning section exists?		75	60	230	0	1
	Transition zone total				1	4	0.25
2. Perception and Visibility		v (km/h)	Länge min (m)		(ACTUAL)	(TARGET)	%
- critical location visible and clearly identifiable
	o each critical point obvious and visible (crossings, driveways, road bends, bus/tram stops, ...)				0	1
	o Visibility is not restricted by plants, buildings, traffic signs, control devices, roadside furniture, …)				0	1
	o roadside furniture/equipment and traffic control devices are clearly visible (traffic signs and signals, markings, safety barriers)				0	1
	o day: luminance of surface/traffic signs sufficient				1	1
	o night: lightning and luminance of surface/traffic signs sufficient, retro- reflection of signs and markings is sufficcient				-	-
- curves are visible
	o curves are visible (at least 6 sec. ahead to the braking section)				0	1
	o curve is not on/behind a crest				1	1
	o shoulder and marking of the outer curve are visible				1	1
	o visibility on the inner curve is not restricted				0	1
-intersection - visibility triangle from minor road is not obstructed?
	o priority traffic is visible for at least 6 sec. ahead	20.8333	125	-	0	1
	o intersection is not on or behind a crest				1	1
	o intersection is better in a sag then on a crest in a hilly terrain				-	-
	o intersection is not in or after a curve				0	1
-intersections - minor road: unmistakable right of way?
	o minor road is narrower than the main road				0	1
	o surface of the main road is of higher quality than the minor road				0	1
	o lay-out of main and minor road are not similar				1	1
	o minor road’s surface is clearly distinguishable from the main road’s surface (e.g. colour variations or different paving material)				0	1
	Perception and visibility total				5	15	0.333333
	6-Seconds Rule total				6	19	0.315789
Vervielfältigung dieser Unterlage sowie Verwertung und Mitteilung ihres Inhaltes sind unzulässig, soweit nicht ausdrücklich zugestanden. Zuwiderhandlungen sind strafbar und verpflichten zu Schadensersatz (LitUrhG, UWG, BGB). Alle Rechte für den Fall der Patenterhaltung und der GM-Eintragung vorbehalten. © Intelligenz System Transfer GmbH, Dr. Sibylle Birth. Potsdam, 2017.
Class II - Field of View Rule			* Anzahl relevanter Merkmale:
			1 = relevant, 0 = irrelevant
1. Density of the field of view					IST (ACTUAL)		%
- monotonous approaching section / surroundings of road avoided?
	o diversified planting (variation in height, distance, ...)				1	1
	o good light contrast and good colour contrast in the environment (especially at night)				1	1
	o road environment well structured (e.g. by fixation objects that attract drivers attention, but do not distract) (closer,in the periphereal field of view)				1	1
- Long/far visible approaching sections before critical points avoided?
	o road environment well structured (e.g. by fixation objects that guide drivers attention, but do not distract) (to the horizon)				0	1
	o road environment well structured (e.g. by sinuous “rhythmic” alignment)				1	1
	Density of the field of view total				4	5	80
2. Fixation objects in the lateral roadside environment support optimal lane-keeping					IST		%
- structures above the road support optimal lane-keeping?
	o equal height				1	1
	o symmetrical				0	1
	o parallel: angle of skew kess than 15°				0	1
- eye-catching objects do not disturb lane-keeping?
	o eye catching objects do not 'disrupt' the continuity of lateral guidance clues				0	1
	o eye catching objects are symmetrical with road’s centre-line				0	1
	o view axis to eye-catching objects aligns with the road axis				0	1
- illusion-free optical guidance supports optimal lane-keeping? (it should be considered the road framework in the periphereal field of view: not to the horizon and considering the balancing of the cross-section, nothing in a longitunal point of view)
	o lateral guidance clues/orientation lines are parallel				0	1
	o lateral guidance clues/orientation lines are consistently spaced + equally sized (the road axis lays between the two mayor optical guidance on the two sides)				0	1
	o lateral guidance clues/orientation lines are unambiguous (it must be clear what are the elements on road margins)				0	1
- carriageway width reductions are well delineated (e.g. control devices, markings, posts, …)					-	-
- roadside objects appear to be vertical?					0	1
- optical framing of curves support lane-keeping?
	o lateral optical guidance-frame of the outer curve is parallel				1	1
	o there are no gaps in the lateral guidance-frame in the outer curve (curve alignment markers, continuous planting, ...)				0	1
	o no obstructions to overview the inner curve				0	1
	o edge line markings in outer and inner curve are visible				1	1
	Lateral roadside clues support lane-keeping total				3	14	21.4286
3. Depth of field of view		v (km/h)	Länge min (m)		IST (ACTUAL)		%
- dominant eye-catching objects support lane-keeping and detection of critical locations?
	o view axis to eye-catching objects aligns with the road axis				1	1
	o eye-catching objects guide the view to critical locations				0	1
- optical illusion avoided?
	o distance illusion avoided (e.g. illusions by non-parallel safety barriers, plantings, or other non-parallel orientation lines, ...)				0	1
	o perspective illusion avoided (e.g. illusions by safety barriers that cover parts of the lane)				1	1
	o curve illusion avoided in both day and night conditions (e.g. sharp curves not co located with vertical curves, lateral guidance in the outer curve is parallel)				0	1
	o at night: signs don’t give wrong expectation of curve direction				-	-
	o estimation of speed and distances supported by reference cues				0	1
- course of the road clearly visible?
	o driver provided with a good optical guidance of the road that is consistent with his expectations				0	1
	o sufficient overtaking opportunities in the last 10-15 minutes				0	1
	o overtaking road sections have sufficient visibility				-	-
	o bridges and crests visible at least 6 sec. ahead to the braking section	50	170		0	1
	Depth of field of view total				2	9	22.2222
	Field of View Rule total				9	28	32.1429
Vervielfältigung dieser Unterlage sowie Verwertung und Mitteilung ihres Inhaltes sind unzulässig, soweit nicht ausdrücklich zugestanden. Zuwiderhandlungen sind strafbar und verpflichten zu Schadensersatz (LitUrhG, UWG, BGB). Alle Rechte für den Fall der Patenterhaltung und der GM-Eintragung vorbehalten. © Intelligenz System Transfer GmbH, Dr. Sibylle Birth. Potsdam, 2017.
Class III - Logic Rule			* Anzahl relevanter Merkmale:
			1 = relevant, 0 = irrelevant
1. Change of road’s function supported by change in design a n d change of optical characteristics (e.g. town entrance)					IST (ACTUAL)		%	deve cambiare davvero la funzione: esempio extraurbano-urbano
- visual clues reinforce changed road function?
	o by changed road surface characteristics (kerbstones, colour, ...)				-	-
	o by changed roadside chracteristics (planting, pavement, sidewalk, footpath, …)				-	-
-eye-catching objects used to reinforce the change (signs, objects, ...)?					-	-
- transition zone adequate?		50	83.3333		-	-
	Change of Function total				0	0	#DIV/0!
2. Change of road’s direction supported by a dominant eye-catching guidance					IST (ACTUAL)		%
- The right road layout is visible and clearly perceived?					0	1
- eye-catching objects are used to focus attention to the right alignment (traffic signs, objects, plants, ...)?					0	1
- transition zone before the alignment misleading is adequate (4-6 seconds)?		50	83.3333		0	1
- there are no misleading eye-catchers along the wrong road alignment? (if so, they are addressed by planted embankments, placement of fixation objects, ...)					0	1
	change of road’s direction total				0	4	0
3. Effect of pre-programmed habits and expectations					IST (ACTUAL)	TARGET	%
- requirement for a new driving programme is recognised?					0	1
- changes introduced to 're-programme' driving habits and expectations?
	o by change of alignment (e.g. roundabouts, curved approaches, median entry treatments...)				0	1
	o by adequate transition zone with anticipation and response section at minimum				0	1
	o by ensuring that the modified road arrangement and alignment beyond are clearly visible				0	1
	o by ensuring visibility of the modified traffic control devices				0	1
- road alignment conforms with drivers expectations?
	o road alignment is consistent (ratio radius ↔ radius and radius ↔ straight ahead sections is appropriate)				0	1
	o inconsistency of radii of sequential curves is avoided				0	1
	o unexpected curve alignment is avoided (e.g. compound curve with multiple reducing/changing radii)				0	1
- transition zones and critical locations: visible, understandable and progressively introduced?
	o visible (at least 4-6 seconds ahead)				0	1
	o if visible, the driver has a good overview				-	-
	o clues and instructions are understandable				0	1
	o there are multiple clues and instructions for the specific CHLs, and they are progressively implemented (at least one is directly associable to the CHLs to which it refers, because the CHL is visible after the clues/instruction)				0	1
	Effect of pre-programmed habits and expectations total				0	11	0
4. Sudden increase of decision needs and overload of information processing capabilities (e.g. multiple critical locations)					IST (ACTUAL)		%
- multiple critical locations avoided?					0	1
- all critical locations are visible?					0	1
- overload of information processing avoided?					0	1
- not more than 3 decisions are necessary? (decision is each possible manouvre the driver can do to face both the CHLs and CRLs in a range of 2-3 seconds)					1	1
- driver progressively informed of multiple critical points?					0	1
- adaption time after tunnels = 4-6 second to the next critical point? (no sharp bends, intersections, traffic signs, etc. directly after tunnels, if so: there is provided enough anticipation and response time)?					-	-
Multiple critical locations / overload of information processing capacity total					1	5	20
5. Deficiencies in traffic control devices					IST (ACTUAL)		%
- traffic control devices visible against background (size, contrast, brightness)					0	1
- traffic control devices appropriate for the road characteristics? (e.g. size of the signs too little for the road type, or inappropriate shape)					1	1
- traffic control devices in accordance with drivers expectation?					0	1
- pictogrammes and letters readable + understandable?					1	1
- road alignment consistent with the traffic control devices?					0	1
	Deficiencies in traffic control devices total				2	5	40
	Logic Rule total				3	25	12
All three Rules Total					18	72	25
Vervielfältigung dieser Unterlage sowie Verwertung und Mitteilung ihres Inhaltes sind unzulässig, soweit nicht ausdrücklich zugestanden. Zuwiderhandlungen sind strafbar und verpflichten zu Schadensersatz (LitUrhG, UWG, BGB). Alle Rechte für den Fall der Patenterhaltung und der GM-Eintragung vorbehalten. © Intelligenz System Transfer GmbH, Dr. Sibylle Birth. Potsdam, 2017.

## Sheet: Data
				Fase I		Fase II
	Punti singolari		Tipo di strada	L min	L max	L min	L max
	Input Challenging Location		Input road category
	Curve		Motorway	0.2	1
	Crossing		Rural Highway	0.15	0.3
	Driveway		Rural Local	0.15	0.3
	Stopping area		Urban Arterial
	At-grade intersection		Urban Collector
	Level crossing		Urban Local
	Lane Change
	Other (any point that potentially requires a change in driver behaviour)		Risposte sì no
			Yes
			No
	Messaggi lunghezza sezione
	Attenzione - la lunghezza della sezione risulta superiore al valore massimo consigliato per questa categoria di strada
	Lunghezza coerente con la categoria di strada analizzata
1	Attenzione - la lunghezza della sezione risulta inferiore al valore minimo consigliato per questa categoria di strada
2
3
	Direction
	Increasing km post
	Decreasing km post
	-
